# Supplementary material for: The Surveillance of Chikungunya Virus in a Temperate Climate: Challenges and Possible Solutions from the Experience of Lazio Region, Italy
Source: Viruses. 2018 Sep 14;10(9):501. doi: 10.3390/v10090501 (PMC6163295; doi:10.3390/v10090501)
Supplement: Supplementary file 1 [file viruses-10-00501-s001.pdf]

| <b>CHIKUNGUNYA SYNDROME</b>          |                                                                                                            |
|--------------------------------------|------------------------------------------------------------------------------------------------------------|
| <b>At least one of the following</b> |                                                                                                            |
| 782.1                                | Rash and other non-specific skin rashes                                                                    |
| 719.4                                | Joint pain                                                                                                 |
| 719.40                               | Arthralgia, unspecified site                                                                               |
| 719.41                               | Arthralgia, shoulder                                                                                       |
| 719.42                               | Arthralgia, elbow                                                                                          |
| 719.43                               | Arthralgia, wrist                                                                                          |
| 719.44                               | Arthralgia, carpus, metacarpus and interphalangeal joints of the hand                                      |
| 719.45                               | Arthralgia, hip                                                                                            |
| 719.46                               | Arthralgia, knee                                                                                           |
| 719.47                               | Arthralgia, tibio-tarsic and joints of the foot                                                            |
| 719.48                               | Arthralgia, other specified locations                                                                      |
| 719.49                               | Arthralgia, multiple sites                                                                                 |
| 711                                  | Arthropathy from infectious agents                                                                         |
| 711.9                                | Infectious arthritis unspecified<br>Arthritis or infectious polyarthritis (acute) (chronic) (subacute) SAI |
| 711.90                               | Infectious arthritis, unspecified, location not specified                                                  |
| 711.91                               | Infectious, unspecified arthritis, shoulder                                                                |
| 711.92                               | Infectious arthritis unspecified, Elbow                                                                    |
| 711.93                               | Infectious arthritis, unspecified, wrist                                                                   |
| 711.94                               | Unspecified infectious arthritis, carpus, metacarpus and interphalangeal joints of the hand                |
| 711.95                               | Infectious arthritis, unspecified, hip                                                                     |
| 711.96                               | Infectious infectious arthritis, knee                                                                      |
| 711.97                               | Infectious, unspecified arthritis, tibio-tarsic and joints of the foot                                     |
| 711.98                               | Infectious arthritis unspecified, others specified locations                                               |
| 711.99                               | Infectious infectious arthritis, multiple locations                                                        |
| <b>ARBOVIROSES SYNDROME</b>          |                                                                                                            |
| <b>At least one of the following</b> |                                                                                                            |
| 061                                  | Dengue                                                                                                     |
| 065                                  | Hemorrhagic fever by arthropods                                                                            |
| 065.0                                | Crimea-Congo haemorrhagic fever                                                                            |
| 065.1                                | Hemoglobin fever of Omsk                                                                                   |
| 065.2                                | Kyasanur forest disease                                                                                    |
| 065.3                                | Other tick-borne fever                                                                                     |
| 065.4                                | Hemorrhagic fever by mosquitoes                                                                            |
| 065.8                                | Other hemorrhagic fevers by arthropods, specified                                                          |
| 065.9                                | Hemorrhagic fevers by arthropods, unspecified                                                              |
| 066.3                                | Other mosquito fevers                                                                                      |
| 066.4                                | West Nile Fever                                                                                            |
| 066.40                               | West Nile Fever unspecified                                                                                |
| 066.41                               | West Nile Fever with Encephalitis                                                                          |
| 066.42                               | West Nile Fever with other neurological                                                                    |

|                                                                        |                                                                                                     |
|------------------------------------------------------------------------|-----------------------------------------------------------------------------------------------------|
|                                                                        | complications                                                                                       |
| 066.49                                                                 | West Nile Fever with other complications                                                            |
| 062                                                                    | Viral mosquito encephalitis                                                                         |
| 062.0                                                                  | Japanese encephalitis                                                                               |
| 062.1                                                                  | West type equine encephalitis                                                                       |
| 062.2                                                                  | Equine encephalitis type est                                                                        |
| 062.3                                                                  | Encephalitis of St. Louis                                                                           |
| 062.4                                                                  | Australian encephalitis                                                                             |
| 062.5                                                                  | California virus encephalitis                                                                       |
| 062.8                                                                  | Other viral mosquito encephalitis, specified                                                        |
| 060                                                                    | Yellow fever                                                                                        |
| 062.9                                                                  | Viral mosquito encephalitis, unspecified                                                            |
| 063                                                                    | Tick-borne viral encephalitis                                                                       |
| 063.0                                                                  | Russian spring-summer encephalitis [taiga]                                                          |
| 063.1                                                                  | Louping ill                                                                                         |
| 063.2                                                                  | Central European encephalitis                                                                       |
| 063.8                                                                  | Other viral tick-borne encephalitis, specified                                                      |
| 063.9                                                                  | Tick-borne viral encephalitis, unspecified                                                          |
| 064                                                                    | Viral encephalitis transmitted by other and unspecified arthropods                                  |
| 066                                                                    | Other viral diseases from arthropods                                                                |
| 066.0                                                                  | Phlebotomist fever                                                                                  |
| 066.1                                                                  | Tick fever                                                                                          |
| 066.2                                                                  | Equine fever of Venezuela                                                                           |
| <b>ARTHROPOD BITE SYNDROME</b><br><b>At least one of the following</b> |                                                                                                     |
| E906.4                                                                 | Bite of non-poisonous arthropod                                                                     |
| 910.4                                                                  | Arthropod bite, not poisonous, without mention of face, neck and scalp infection, excluding the eye |
| 910.5                                                                  | Arthropod bite, non-poisonous, with face, neck and scalp infection, excluding the eye               |
| 911.4                                                                  | Arthropod bite, not poisonous, without mention Of trunk infection                                   |
| 911.5                                                                  | Arthropod bite, not poisonous, with trunk infection                                                 |
| 912.4                                                                  | Arthropod bite, not poisonous, without mention of shoulder and arm infection                        |
| 912.5                                                                  | Arthropod bite, non-poisonous, with shoulder and arm infection                                      |
| 913.4                                                                  | Arthropod bite, not poisonous, without mention                                                      |

|       |                                                                                                          |
|-------|----------------------------------------------------------------------------------------------------------|
|       | of elbow, forearm and wrist infection                                                                    |
| 913.5 | Arthropod bite, non-poisonous, with elbow, forearm and wrist infection                                   |
| 914.4 | Arthropod bite, not poisonous, without mention of hand infection                                         |
| 914.5 | Arthropod bite, not poisonous, with hand infection                                                       |
| 915.4 | Arthropod bite, not poisonous, without mention of infection fingers of the hand                          |
| 915.5 | Arthropod bite, non-poisonous, with hand fingers infection                                               |
| 916.4 | Arthropod bite, not poisonous, without mention of infection of the hip, thigh, leg and ankle             |
| 916.5 | Arthropod bite, non-poisonous, with infection of the hip, thigh, leg and ankle                           |
| 917.4 | Arthropod bite, not poisonous, without mention of infection of the foot and toes                         |
| 917.5 | Arthropod bite, non-poisonous, with infection of the foot and toes                                       |
| 919.4 | Arthropod bite, not poisonous, without mention of infection of other, multiple and unspecified locations |
| 919.5 | Arthropod bite, non-venomous, with infection of other, multiple and unspecified locations                |
